# Supplementary material
Source: publisher figshare collection journal article supplement (https://tandf.figshare.com/articles/dataset/_/6953345)
Supplement: Supplementary file 1 [file 1]

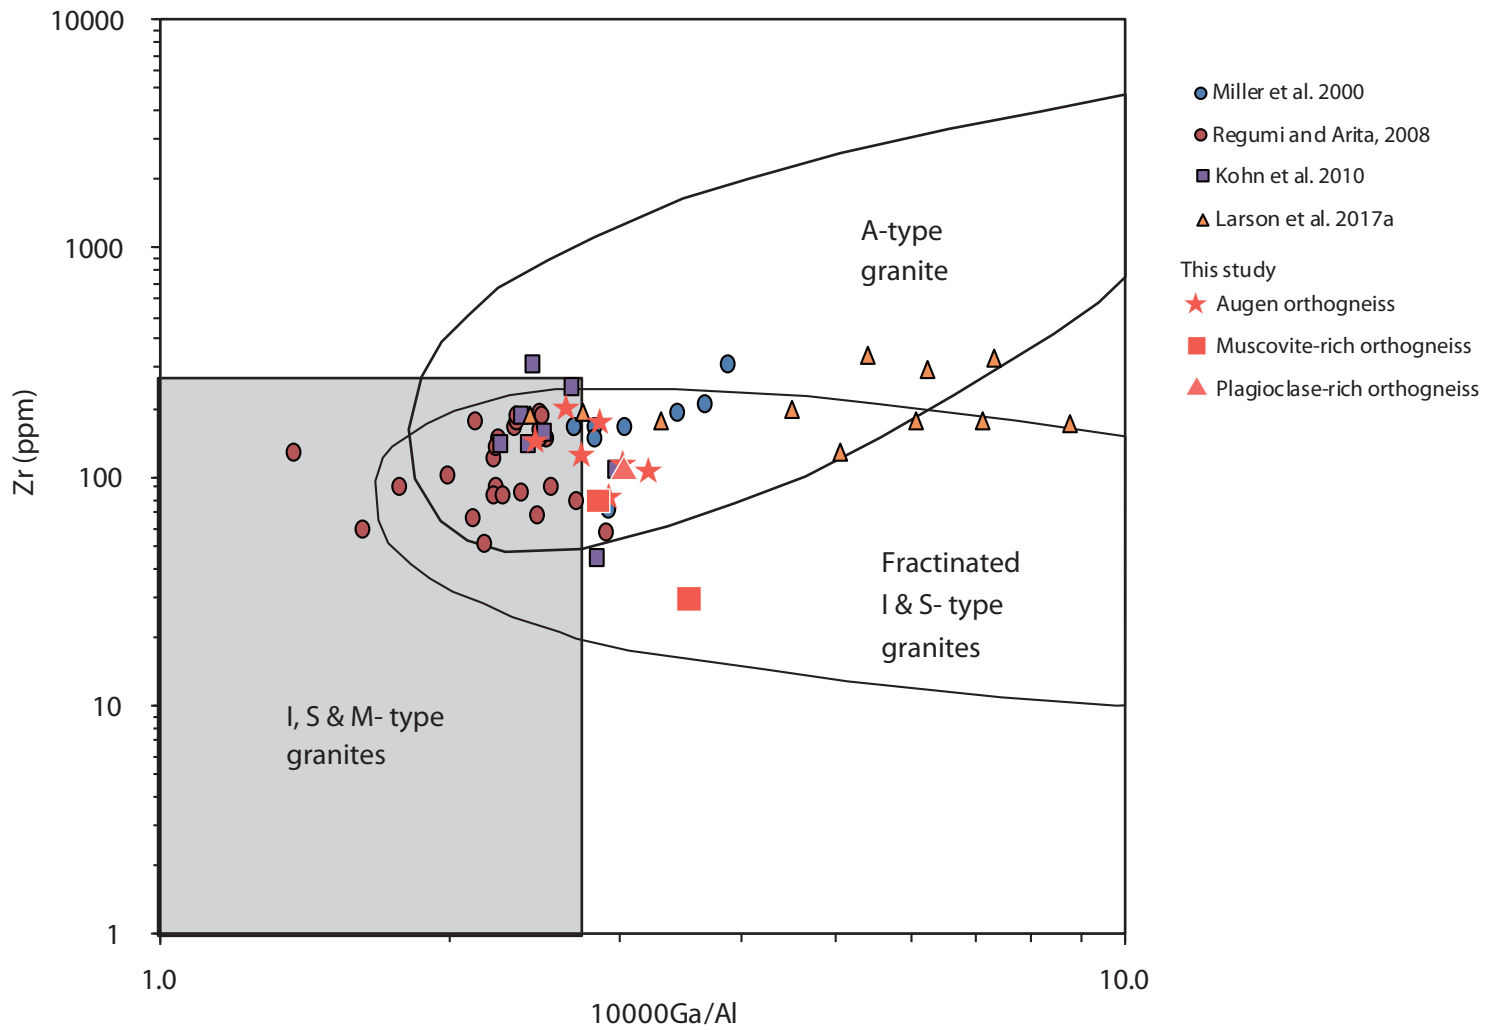

Supplementary Figure 1. Discrimination diagrams of A-type and fractionated I- and S-type granites, based on  $10000\text{Ga}/\text{Al}$  vs. Zr content (Whalen et al. 1987, Wu et al. 2017).

Data source is the same as in Figure 5.

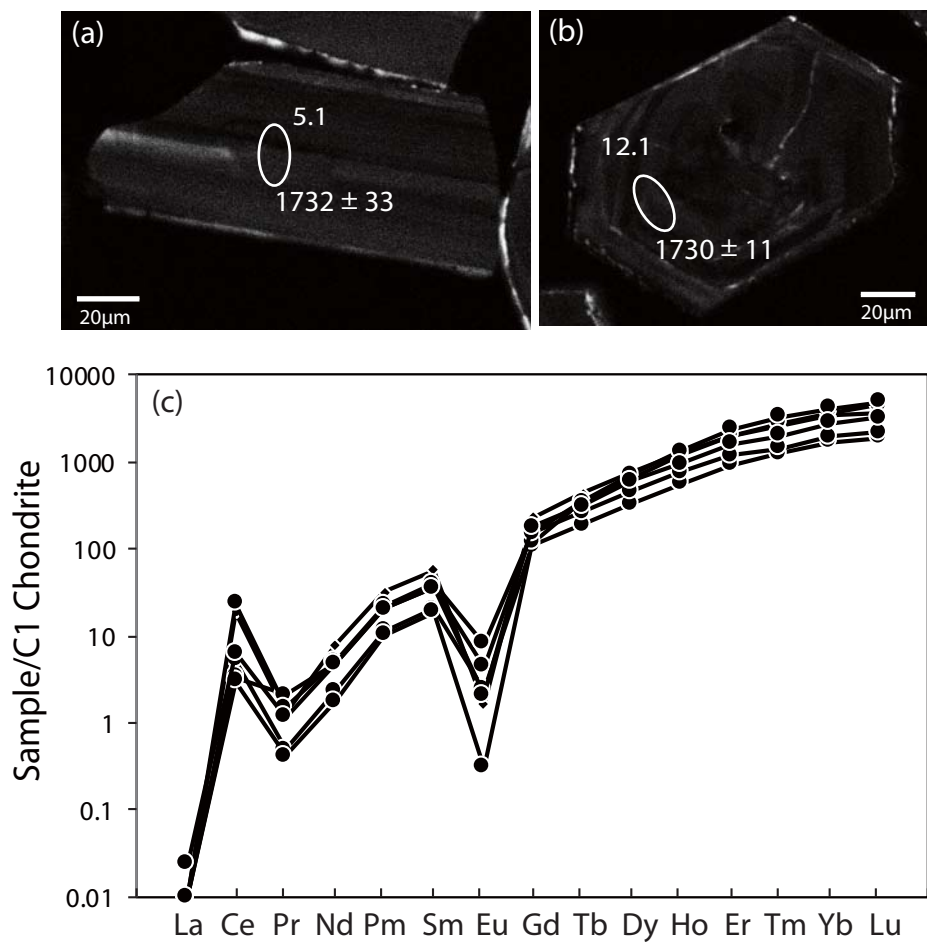

Supplementary Figure 2. (a-b) Cathodoluminescence (CL) images and (c) REE chondrite normalized patterns of representative zircons from augen orthogneiss (sample 1803). The analyzed spots are shown by ellipses with spot number. Numbers indicates  $^{207}\text{Pb}^*/^{206}\text{Pb}^*$  ages in Ma. Normalization factors are from Sun and McDonough (1989).

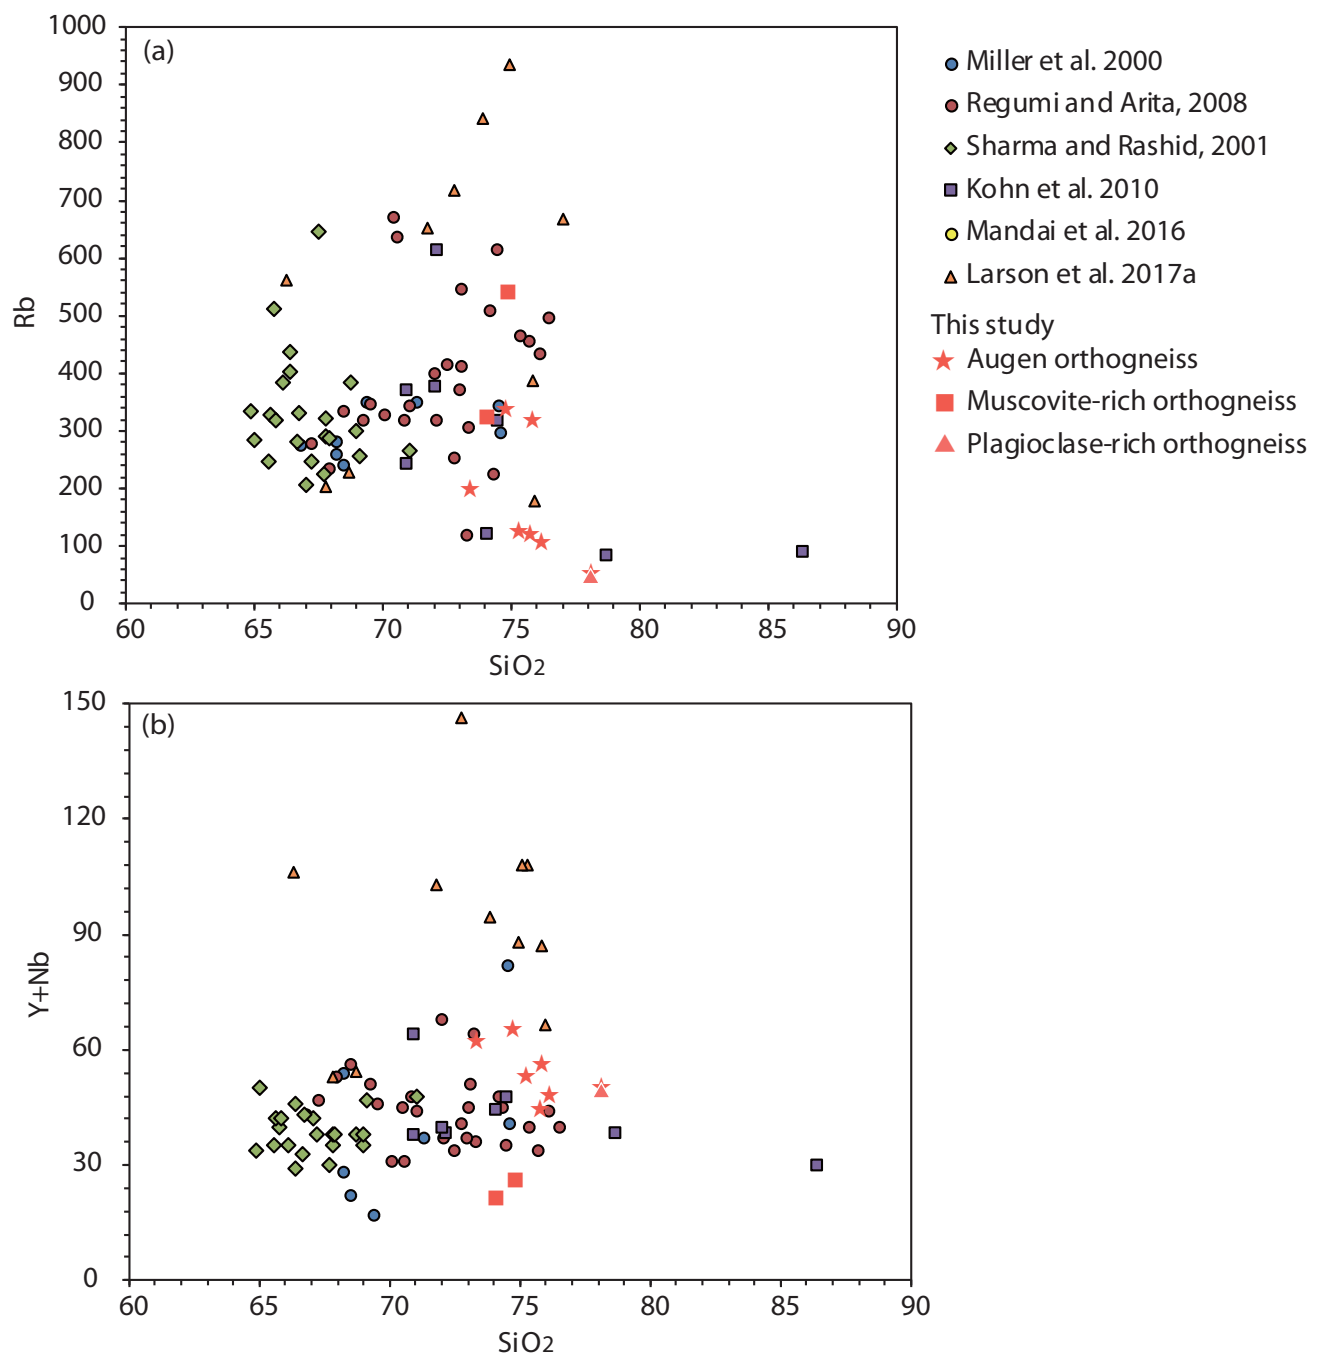

Supplementary Figure 3. The Harker diagram against (a) Rb content and (b) Y+Nb contents.

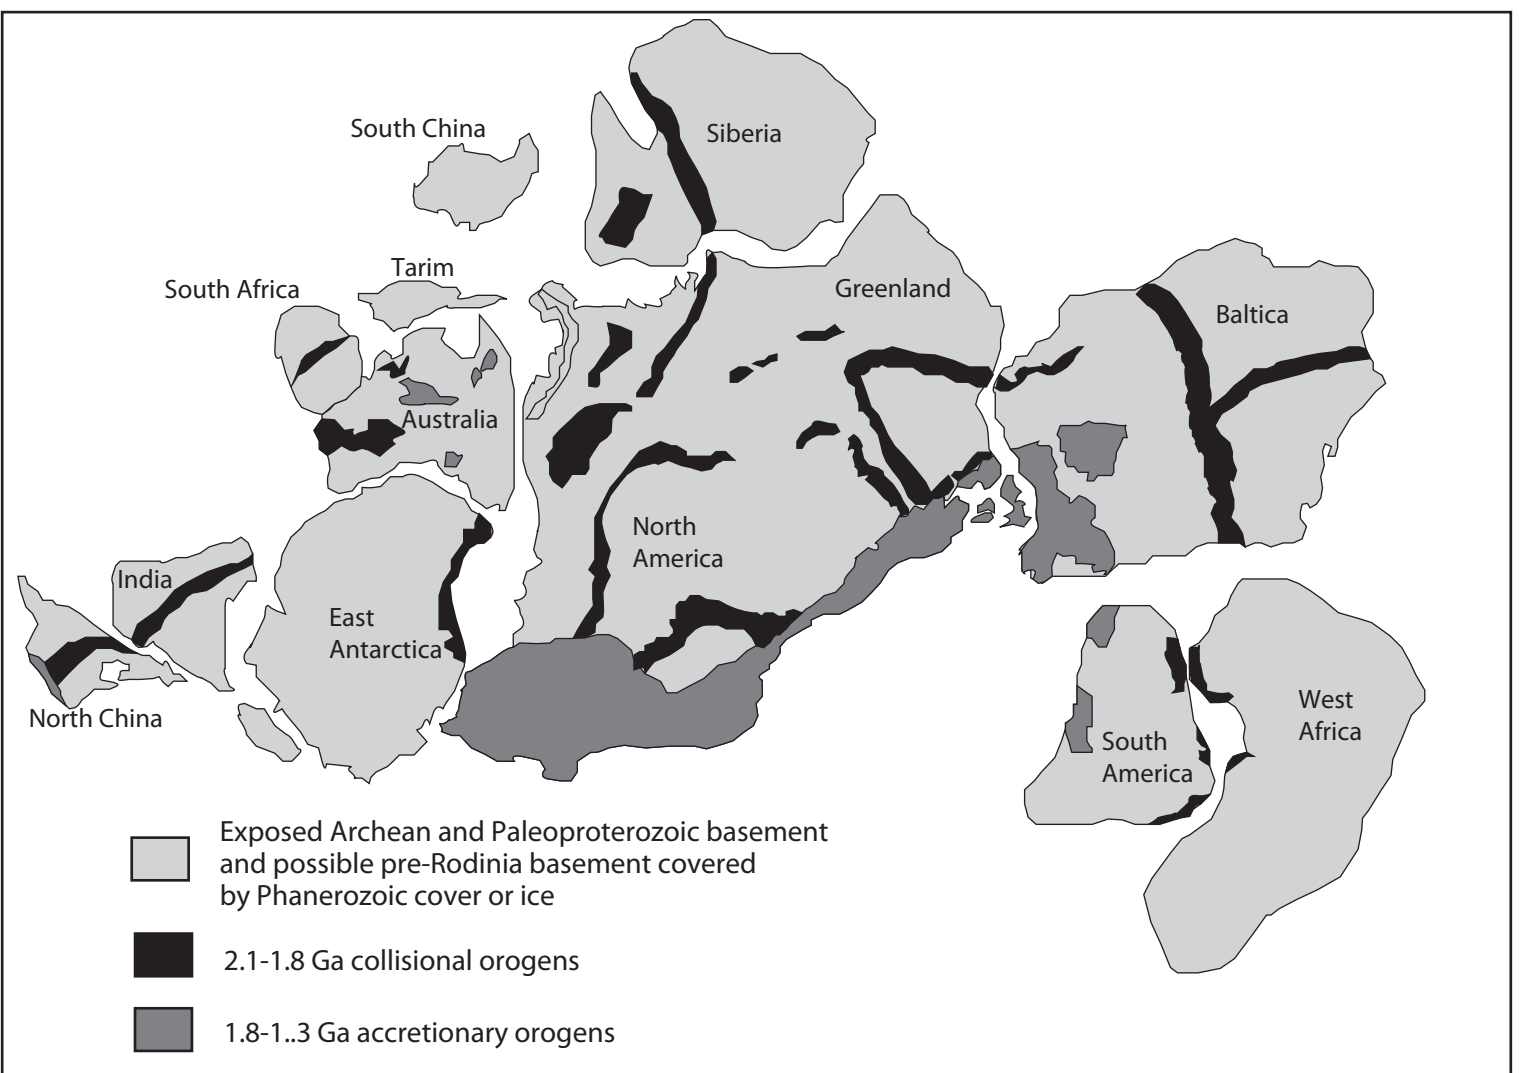

Supplementary Figure 4. A possible reconstruction of the ca. 2.1-1.8 Ga supercontinent Columbia, showing passive margin for northern India and disposition of the Indian plate adjacent to North China craton. Modified from Zhao et al. (2004).
